# Supplementary material for: The Pta-AckA Pathway Regulates LrgAB-Mediated Pyruvate Uptake in Streptococcus mutans
Source: PubMed Central journal article supplement (PMC7355876; doi:10.3390/microorganisms8060846), 2020-06-04
Supplement: microorganisms-08-00846-s001.pdf [file microorganisms-08-00846-s001.pdf]

Table S1. Bacterial strains and plasmids used in this study.

| Stains and plasmids               | Genotype or relevant characteristics                                            | Source           |
|-----------------------------------|---------------------------------------------------------------------------------|------------------|
| Strains                           |                                                                                 |                  |
| UA159                             | Wild type                                                                       | Laboratory stock |
| $\Delta lrgAB$                    | $\Delta lrgAB::\Omega Km^r$                                                     | (29)             |
| $\Delta pta$                      | $\Delta pta::NPKm^r$                                                            | (39)             |
| $\Delta ackA$                     | $\Delta ackA::NPKm^r$                                                           | (38)             |
| $\Delta pta\Delta ackA$           | $\Delta pta::NPEm^r/\Delta ackA::NPKm^r$                                        | (38)             |
| KB12                              | $\Delta pta$ carrying pDL278:: <i>pta</i> ( <i>pta</i> -complemented strain)    | (39)             |
| KB034                             | $\Delta ackA$ carrying pDL278:: <i>ackA</i> ( <i>ackA</i> -complemented strain) | (38)             |
| UA159/ <i>PlrgA-gfp</i>           | UA159 carrying <i>gfp</i> gene fusion to <i>lrgA</i> promoter                   | (30)             |
| UA159/pDL278                      | UA159 carrying pDL278                                                           | (30)             |
| $\Delta lrgAB/PlrgA-gfp$          | $\Delta lrgAB$ carrying <i>gfp</i> gene fusion to <i>lrgA</i> promoter          | This study       |
| $\Delta lrgAB/pDL278$             | $\Delta lrgAB$ carrying pDL278                                                  | This study       |
| $\Delta pta/PlrgA-gfp$            | $\Delta pta$ carrying <i>gfp</i> gene fusion to <i>lrgA</i> promoter            | This study       |
| $\Delta pta/pDL278$               | $\Delta pta$ carrying pDL278                                                    | This study       |
| $\Delta ackA/PlrgA-gfp$           | $\Delta ackA$ carrying <i>gfp</i> gene fusion to <i>lrgA</i> promoter           | This study       |
| $\Delta ackA/pDL278$              | $\Delta ackA$ carrying pDL278                                                   | This study       |
| $\Delta pta\Delta ackA/PlrgA-gfp$ | $\Delta pta\Delta ackA$ carrying <i>gfp</i> gene fusion to <i>lrgA</i> promoter | This study       |
| $\Delta pta\Delta ackA/pDL278$    | $\Delta pta\Delta ackA$ carrying pDL278                                         | This study       |
| Plasmids                          |                                                                                 |                  |
| pDL278                            | <i>E. coli-Streptococcus</i> shuttle vector, $Sp^r$                             | (36)             |
| pDL278:: <i>PlrgA-gfp</i>         | pDL278 carrying <i>gfp</i> gene fusion to <i>lrgA</i> promoter                  | (30)             |

Em<sup>r</sup>, erythromycin resistant cassette; Km<sup>r</sup>, kanamycin resistant cassette; Sp<sup>r</sup>, spectinomycin resistant cassette; NP, nonpolar;  $\Omega$ , polar.

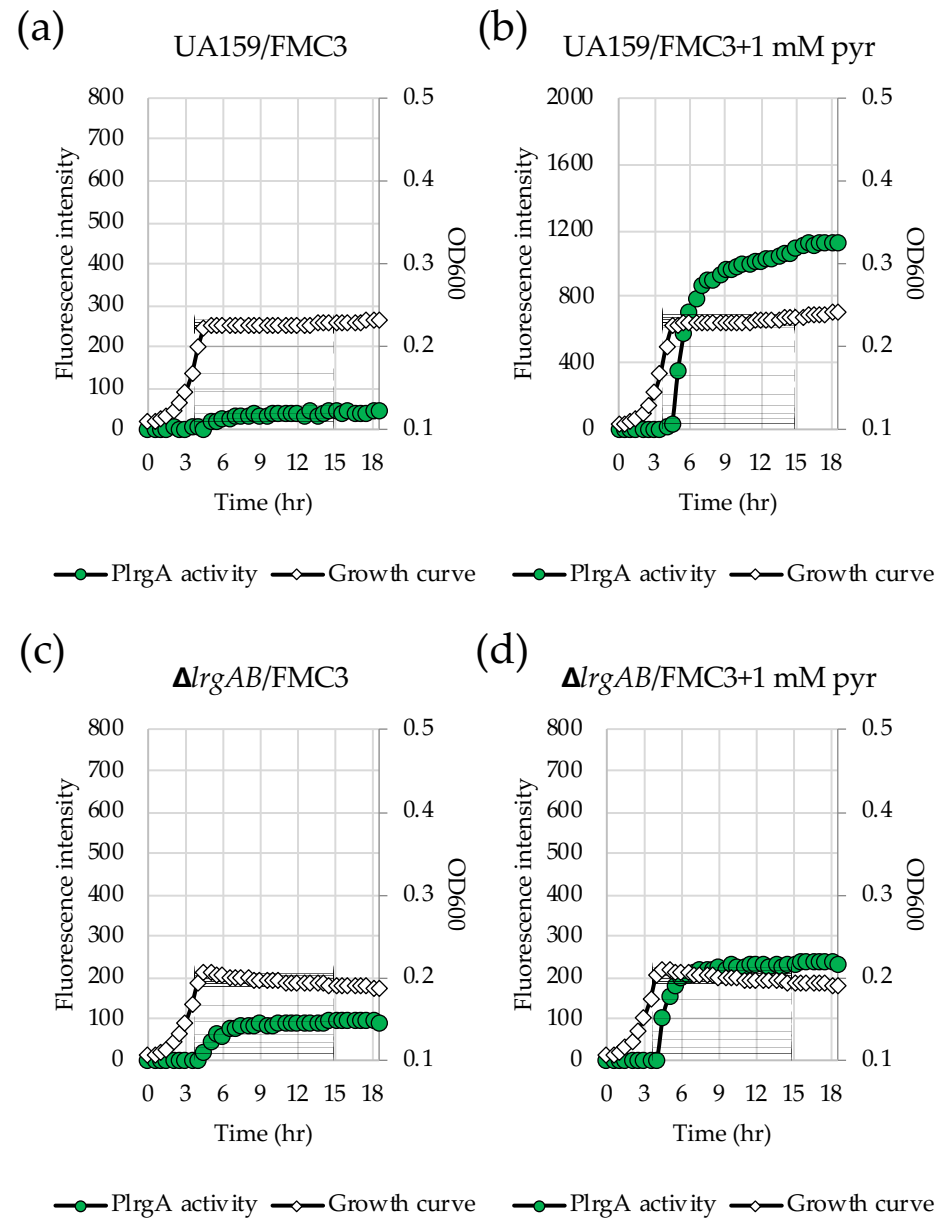

**Figure S1.** Change of *PlrgA* activity during growth of wild type and  $\Delta$ *lrgAB* mutant strains in FMC3 medium with or without 1 mM exogenous pyruvate

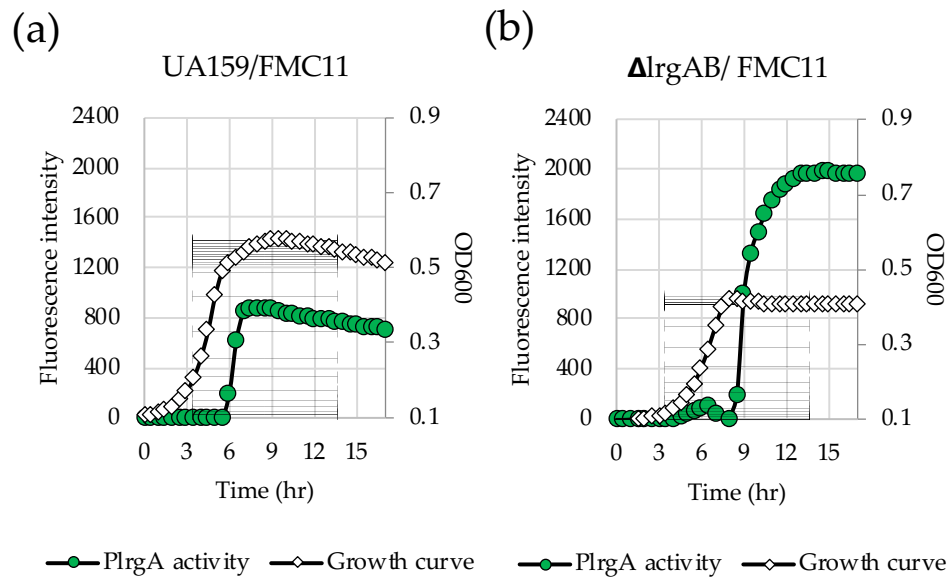

**Figure S2.** Change of *PlrgA* activity during growth of wild type and  $\Delta$ *lrgAB* mutant strains in FMC11 medium.

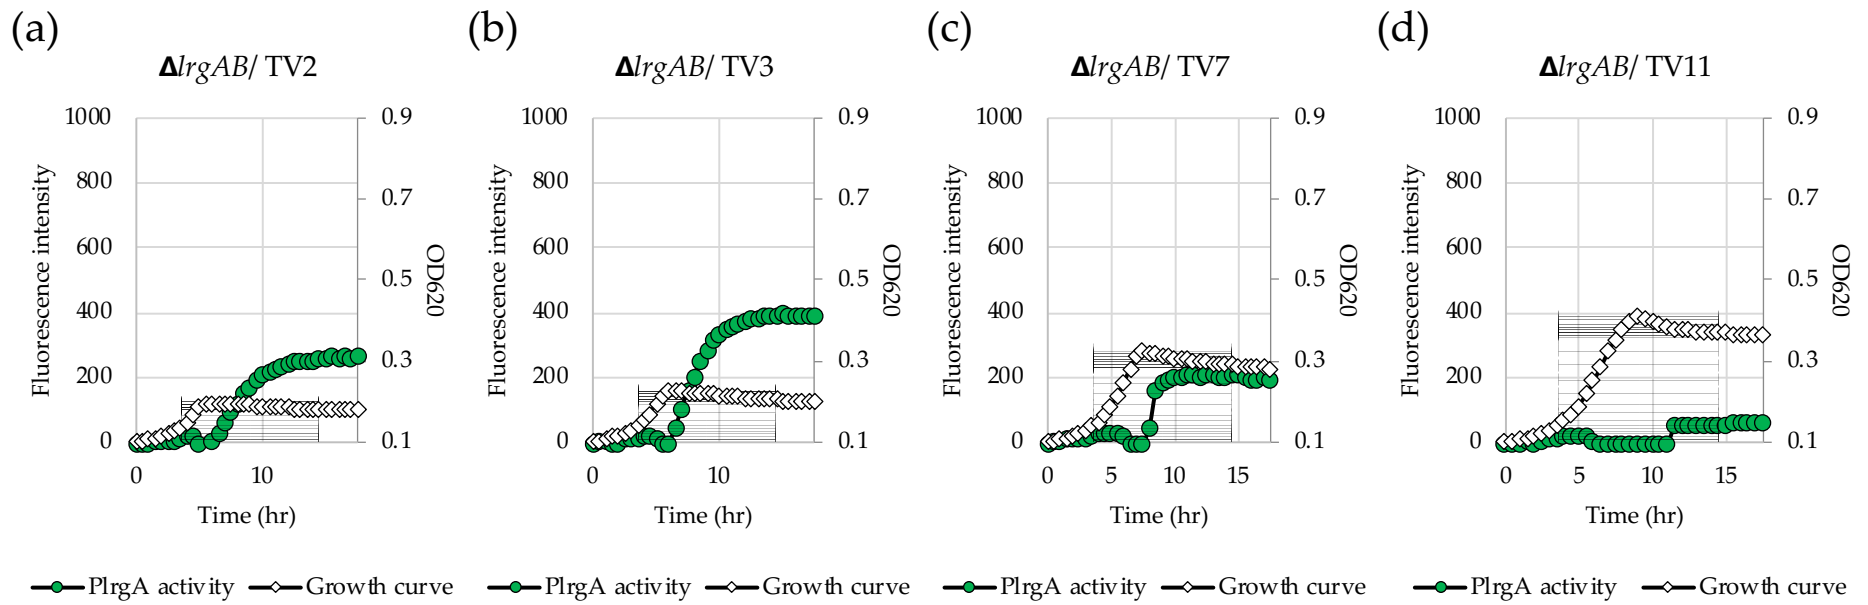

**Figure S3.** Changes of *PlrgA* activity during growth in TV medium containing low concentrations of glucose in the  $\Delta lrgAB$  background.

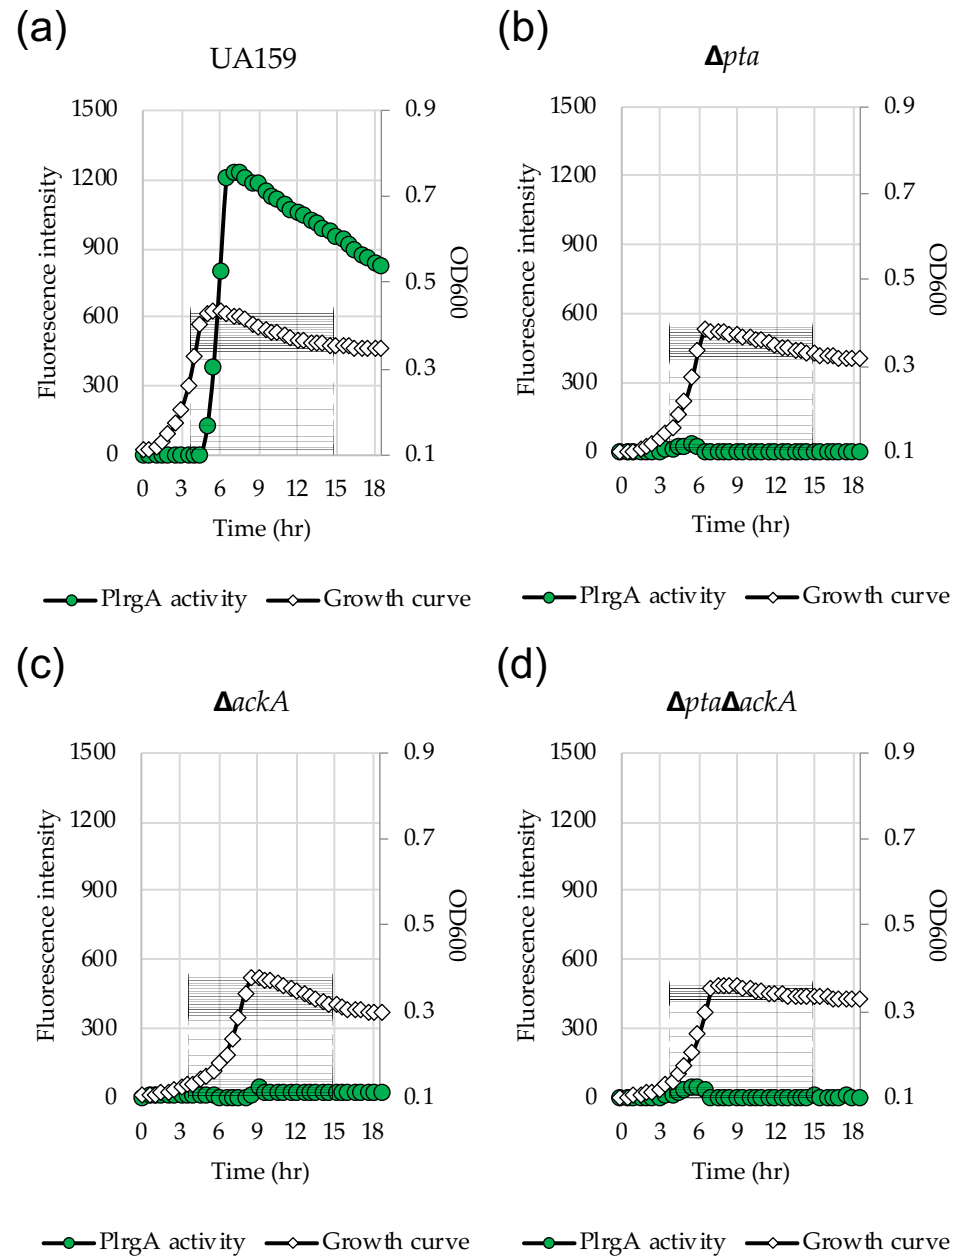

**Figure S4.** The response of *PlrgA* activity to 1 mM pyruvate in FMC 11 medium by disruption of the Pta-AckA pathway.

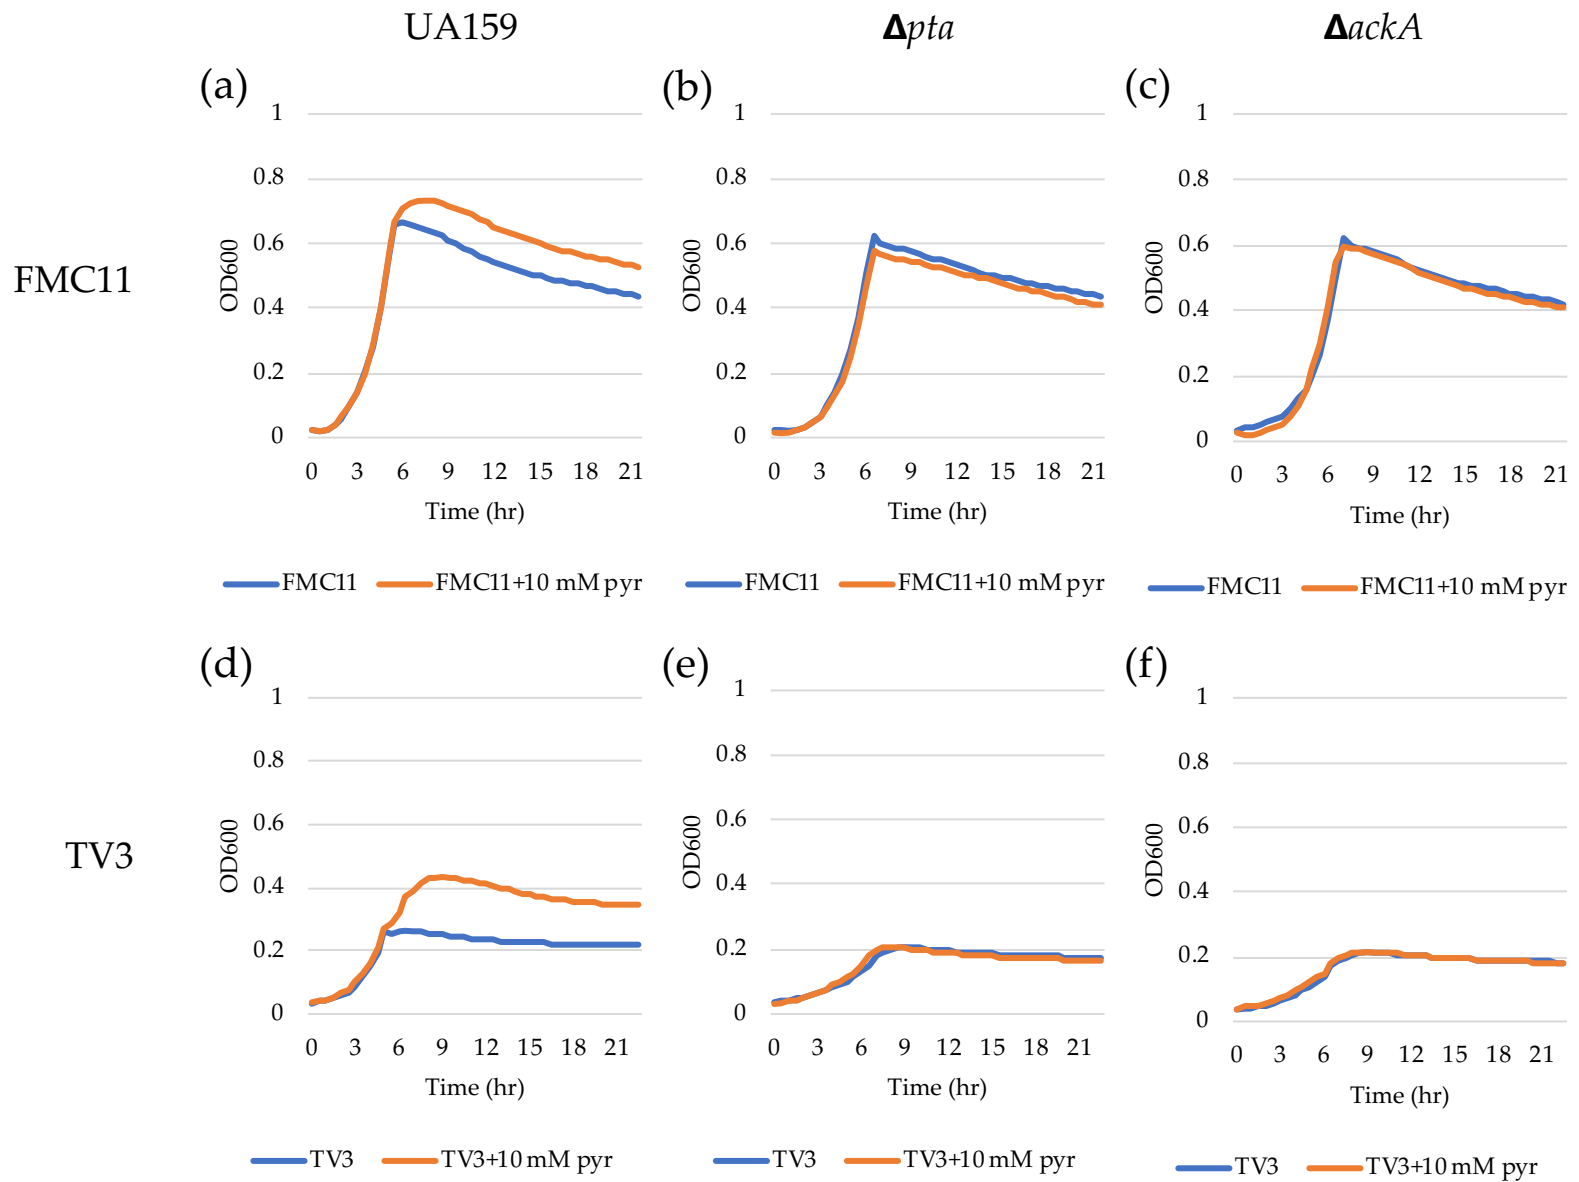

**Figure S5.** The effect of exogenously added pyruvate on the stationary phase of *S. mutans* UA159 wild type,  $\Delta$ *pta* and  $\Delta$ *ackA* strains, grown in FMC11 and TV3.
